# Supplementary material for: Contrasting influences of aerosols on cloud properties during deficient and abundant monsoon years
Source: PubMed Central journal article supplement (PMC5364465; doi:10.1038/srep44996), 2017-03-24
Supplement: srep44996-s1.pdf [file srep44996-s1.pdf]

# **Contrasting influences of aerosols on cloud properties during deficient and abundant monsoon years**

Nitin Patil<sup>1</sup>, Prashant Dave<sup>1</sup>, Chandra Venkataraman<sup>\*,1,2</sup>

<sup>1</sup>Interdisciplinary program in Climate Studies, Indian Institute of Technology Bombay, Powai, Mumbai, India

<sup>2</sup>Department of Chemical Engineering, Indian Institute of Technology Bombay, Powai, Mumbai, India

---

*\*Corresponding Author:*

Prof. Chandra Venkataraman  
Professor of Chemical Engineering  
Convener, Interdisciplinary Programme in Climate Studies  
Indian Institute of Technology Bombay  
Powai, Mumbai - 400 076 (INDIA)  
*E-mail:* chandra@iitb.ac.in  
*Phone:* +91-22 2576 7224  
*Fax:* +91-22- 2572 6895 / 3480

## **List of figures and tables in Supplementary Information**

**Figure S1 | Season (JJAS) precipitation normalized anomalies over R1 (central northeast), R2 (west central) and R3 (northwest).** Used to identify region-specific abundant and deficient rainfall years.

**Figure S2 | Frequency count (as percent of total daily retrievals) of AOD and CDER pairs at each pixel during (a) deficient and (b) abundant rainfall years.** Figure was created using R statistical tool v3.3.1 (<https://www.r-project.org/>) and FERRET v7.0 (<http://www.ferret.noaa.gov/Ferret/>).

**Figure S3 | Box and Whisker plot of region-specific JJAS absolute values at the pixel level during deficient (grey) and abundant (white) rainfall years. (a) AOD, (b) CDER, (c) IWP and (d) CTP.** Mean values during deficient and abundant rainfall years are significantly different at  $P < 0.10$ .

**Figure S4 | Region-specific aerosol absorbing index JJAS anomalies during (a) deficient and (b) abundant rainfall years; and (c) Box and Whisker plot of the absolute values at each pixel.** Figure was created using FERRET v7.0 (<http://www.ferret.noaa.gov/Ferret/>).

**Figure S5 | Region-specific lower tropospheric stability (LTS) JJAS anomalies during (a) deficient and (b) abundant rainfall years.** Figure was created using FERRET v7.0 (<http://www.ferret.noaa.gov/Ferret/>).

**Figure S6 | Region-specific column water vapour JJAS anomalies during (a) deficient and (b) abundant rainfall years.** Figure was created using FERRET v7.0 (<http://www.ferret.noaa.gov/Ferret/>).

**Figure S7 | Temporal correlation cumulative frequency of AOD and CF during (a) deficient and (b) abundant rainfall years (significant at  $P < 0.10$ ).** Figure was created using R statistical tool v3.3.1 (<https://www.r-project.org/>) and FERRET v7.0 (<http://www.ferret.noaa.gov/Ferret/>).

**Table S1.** Number of break periods and days per break period during abundant and deficient rainfall years, based on the Indian Meteorological Department rainfall observations.

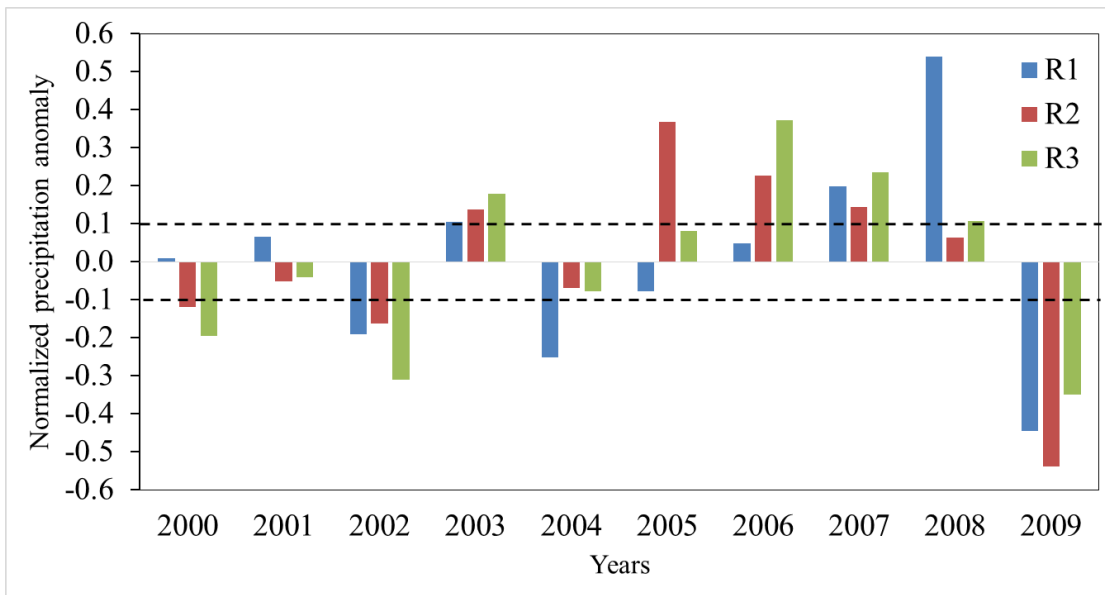

**Figure S1 | Season (JJAS) precipitation normalized anomalies over R1 (central northeast), R2 (west central) and R3 (northwest).** Used to identify region-specific abundant and deficient rainfall years.

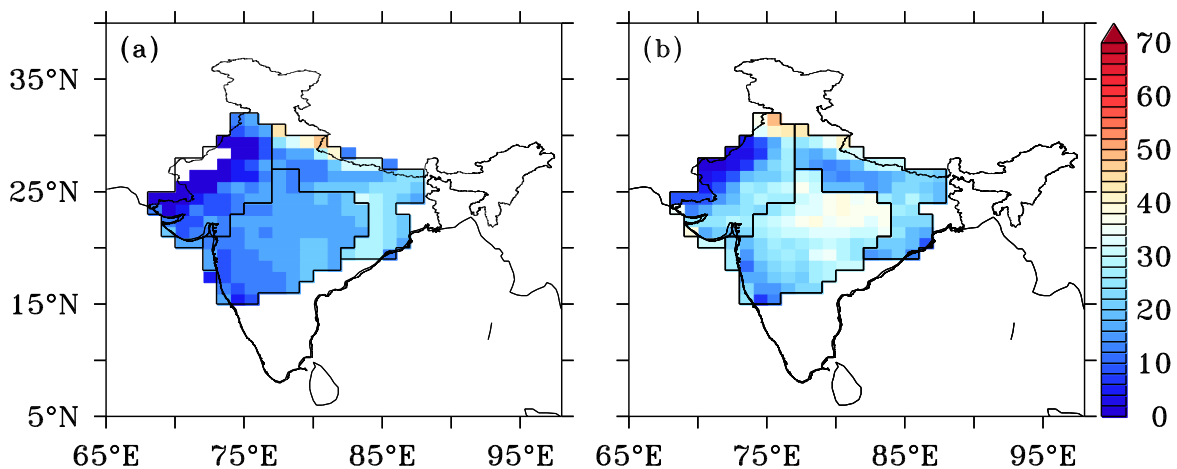

**Figure S2 | Frequency count (as percent of total daily retrievals) of AOD and CDER pairs at each pixel during (a) deficient and (b) abundant rainfall years.** Figure was created using R statistical tool v3.3.1 (<https://www.r-project.org/>) and FERRET v7.0 (<http://www.ferret.noaa.gov/Ferret/>).

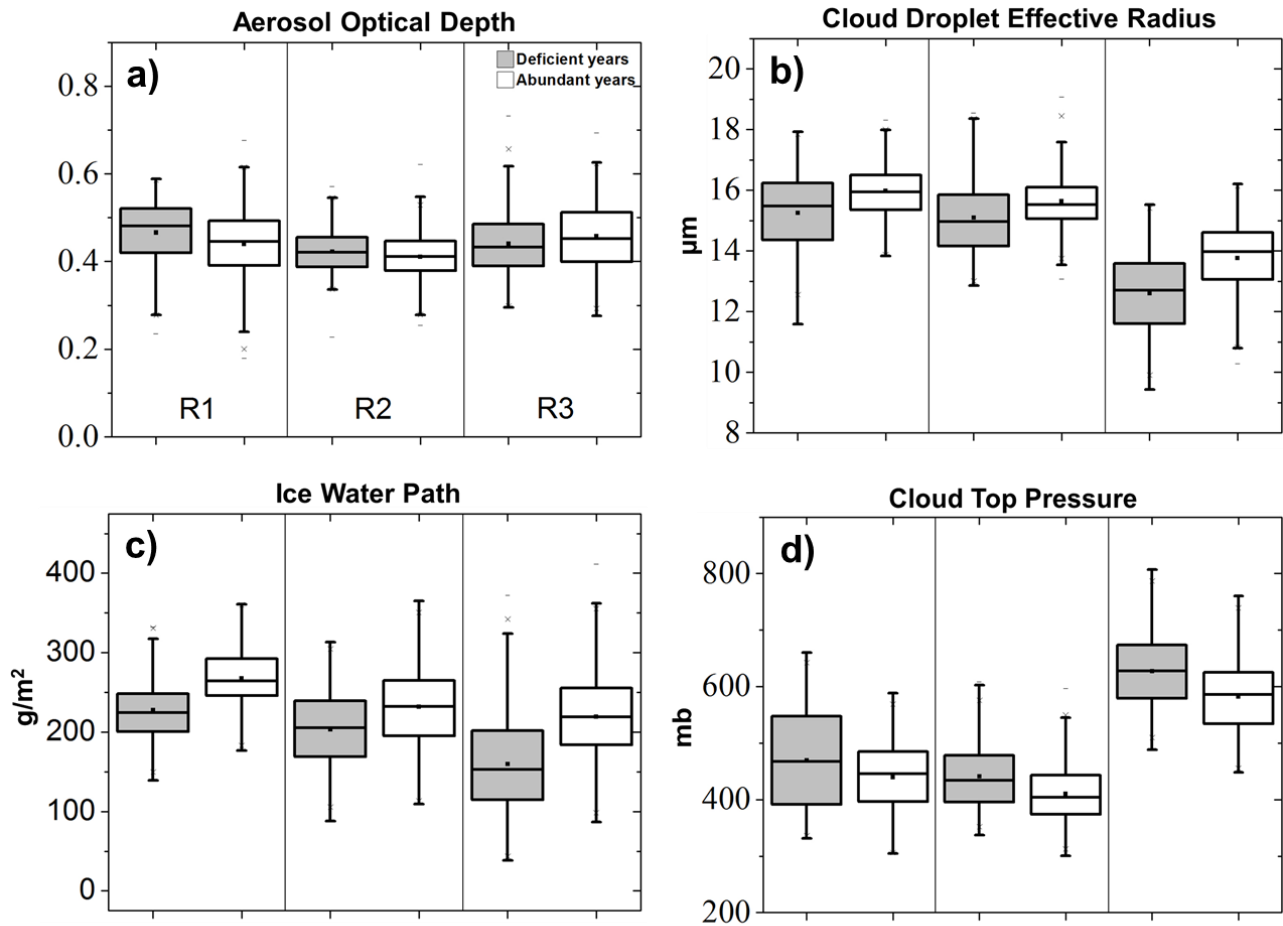

**Figure S3 | Box and Whisker plot of region-specific JJAS absolute values at the pixel level during deficient (grey) and abundant (white) rainfall years. (a) AOD, (b) CDER, (c) IWP and (d) CTP. Mean values during deficient and abundant rainfall years are significantly different at  $P < 0.10$ .**

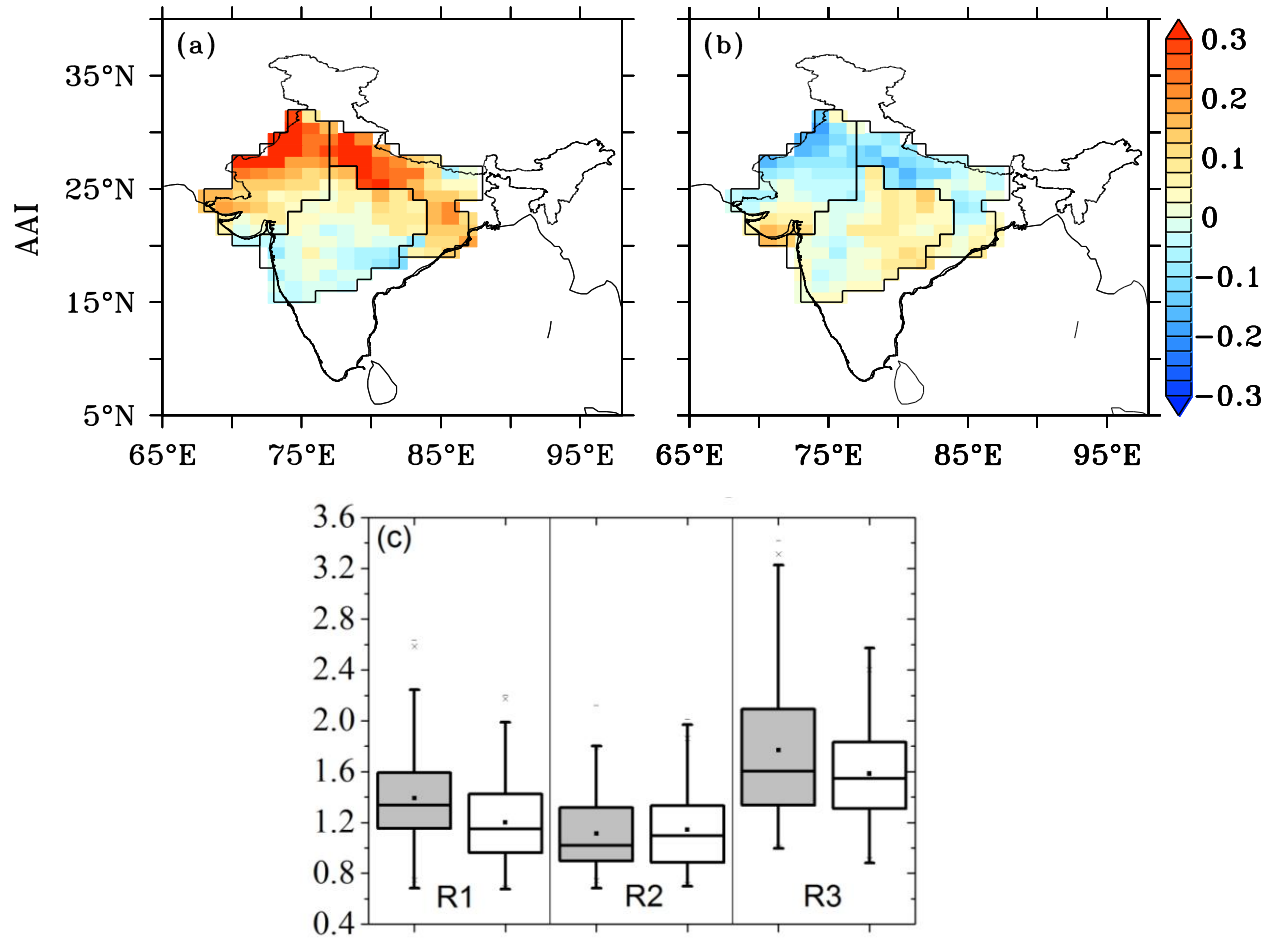

**Figure S4 | Region-specific aerosol absorbing index JJAS anomalies during (a) deficient and (b) abundant rainfall years; and (c) Box and Whisker plot of the absolute values at each pixel.** Figure was created using FERRET v7.0 (<http://www.ferret.noaa.gov/Ferret/>).

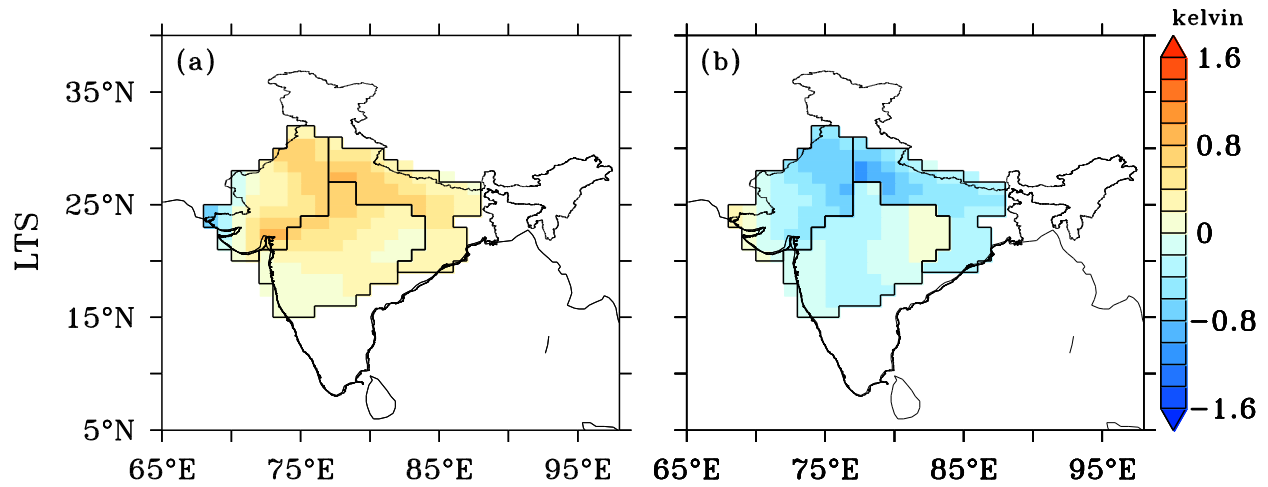

**Figure S5 | Region-specific lower tropospheric stability (LTS) JJAS anomalies during (a) deficient and (b) abundant rainfall years.** Figure was created using FERRET v7.0 (<http://www.ferret.noaa.gov/Ferret/>).

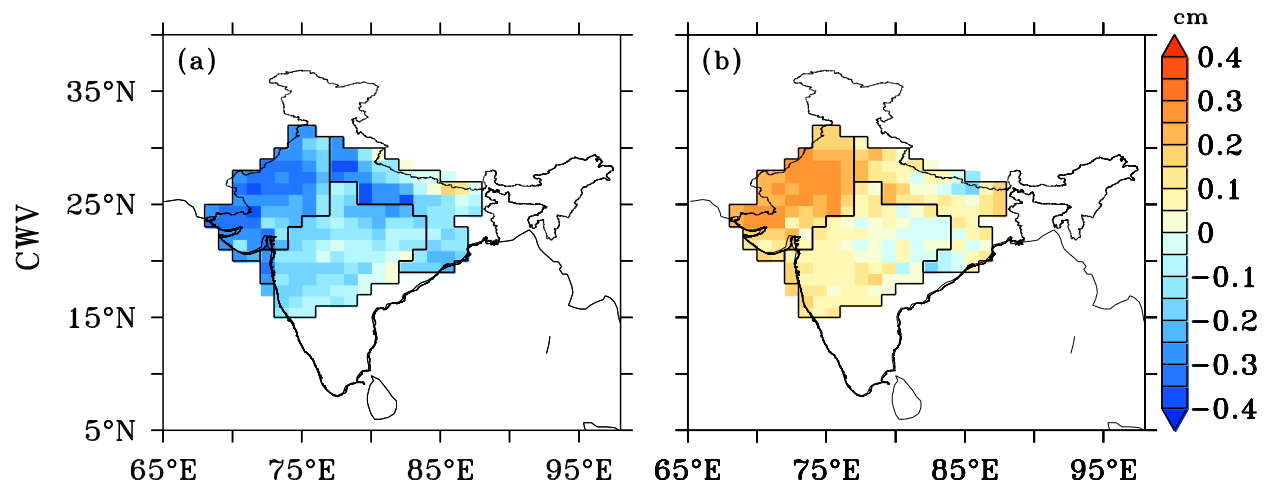

**Figure S6 | Region-specific column water vapour JJAS anomalies during (a) deficient and (b) abundant rainfall years.** Figure was created using FERRET v7.0 (<http://www.ferret.noaa.gov/Ferret/>).

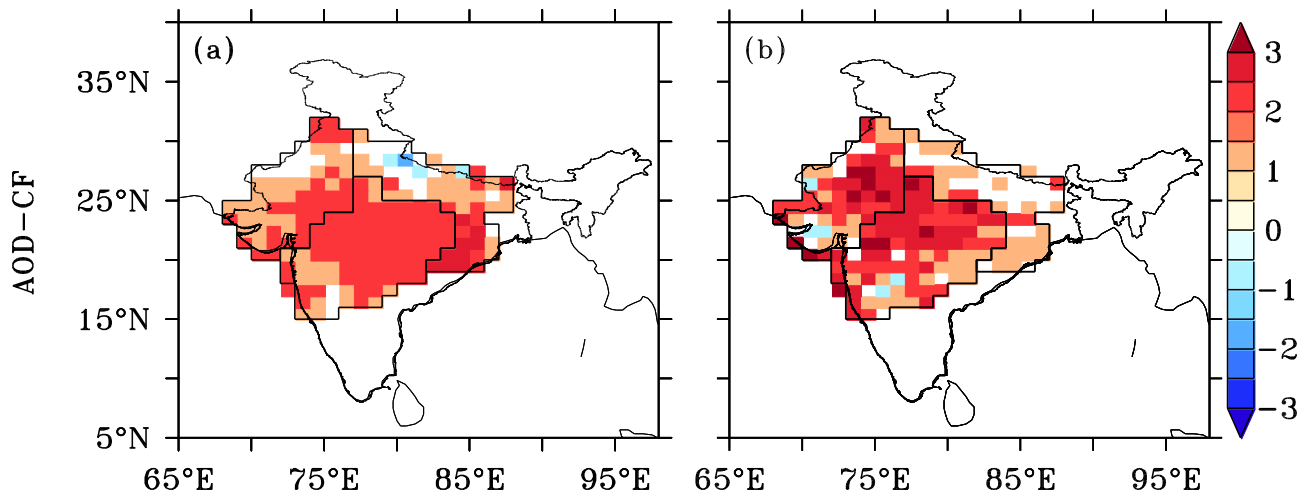

**Figure S7 | Temporal correlation cumulative frequency of AOD and CF during (a) deficient and (b) abundant rainfall years (significant at  $P < 0.10$ ).** Figure was created using R statistical tool v3.3.1 (<https://www.r-project.org/>) and FERRET v7.0 (<http://www.ferret.noaa.gov/Ferret/>).

**Table S1.** Number of break periods and days per break period during abundant and deficient rainfall years, based on the Indian Meteorological Department rainfall observations.

| Regions | Year (# breaks : # days per break)                          |                                                 |
|---------|-------------------------------------------------------------|-------------------------------------------------|
|         | Deficient rainfall years                                    | Abundant rainfall years                         |
| R1      | 2002 (2 : 3, 5); 2004 (3 : 4, 3, 7);<br>2009 (3 : 7, 3, 3)  | 2007 (1 : 3)                                    |
| R2      | 2000 (3 : 5, 3, 6); 2002 (2 : 11, 3);<br>2009 (3 : 4, 3, 7) | 2005 (2 : 4, 3); 2006 (1 : 11);<br>2007 (1 : 3) |
| R3      | 2000 (1 : 4); 2009 (1 : 4)                                  | No breaks                                       |
